# Supplementary material for: The comparative lithium storage properties of urchin-like hematite spheres: hollow vs. solid
Source: Royal Society of Chemistry journal article supplement (doi:10.1039/c2jm31108a), 2012-01-01
Supplement: c2jm31108a.pdf [file c2jm31108a.pdf]

Electronic Supplementary Information (ESI) for

---

## **The comparative lithium storage properties of urchin-like hematite spheres: hollow vs. solid**

Bao Wang, Jun Song Chen and Xiong Wen (David) Lou\*

School of Chemical and Biomedical Engineering, Nanyang Technological University, 70 Nanyang Drive, Singapore 637457, Singapore. E-mail: [xwlou@ntu.edu.sg](mailto:xwlou@ntu.edu.sg); [davidlou88@gmail.com](mailto:davidlou88@gmail.com)

Energy Research Institute @ NTU, Nanyang Technological University, 50 Nanyang Drive, Singapore 637553, Singapore

### **Experimental**

**Materials preparation.** In a typical synthesis, 0.1112 g  $\text{FeSO}_4 \cdot 7\text{H}_2\text{O}$  (Sigma-Aldrich, 99.9%) was dissolved in 40 mL of a glycerol/water mixture containing 2, 3 or 5 mL glycerol. After stirring for about 10 minutes, a translucent solution was obtained and then transferred into a 50 mL Teflon-lined stainless steel autoclave, followed by heating at 120 °C for a period of 24 h in an electric oven. After heating, the autoclave was cooled naturally to room temperature. The precipitate was collected and washed with water and ethanol several times by centrifugation, then dried at 60 °C overnight. Then the precursors are calcined at 300 °C for 2 h, after cooling down to room temperature, hierarchical urchin-like hematite hollow spheres were obtained.

**Materials characterization.** The structure and morphology of products were examined with transmission electron microscopy (TEM; JEOL, JEM-2010, 200 kV), and field emission scanning electron microscopy (FESEM; JEOL, JSM-6700F, 5 kV). The powder X-ray diffraction (XRD) analysis was carried out with X-ray powder diffraction (Bruker, D8–Advance X-Ray Diffractometer,

Cu K $\alpha$ ,  $\lambda = 1.5406 \text{ \AA}$ ). The N<sub>2</sub> adsorption and desorption isotherm was obtained using a Quantachrome Instruments, Autosorb AS-6B.

**Electrochemical measurements.** The electrochemical tests were carried out using two-electrode cells with pure lithium metal as the counter and reference electrodes at room temperature. The working electrode consists of active material (e.g., Fe<sub>2</sub>O<sub>3</sub> spheres), a conductive agent (carbon black, Super-P-Li), and a polymer binder (polyvinylidene difluoride, PVDF, Aldrich) in a weight ratio of 80:10:10. The electrolyte used was 1.0 M LiPF<sub>6</sub> in a 50:50 (w/w) mixture of ethylene carbonate and diethyl carbonate. Cell assembly was carried out in an Ar-filled glovebox with concentrations of moisture and oxygen below 1.0 ppm. The charge/discharge tests were performed using a NEWARE battery tester at a constant current rate of 200 mA g<sup>-1</sup> with a voltage window of 0.05–3.0 V.

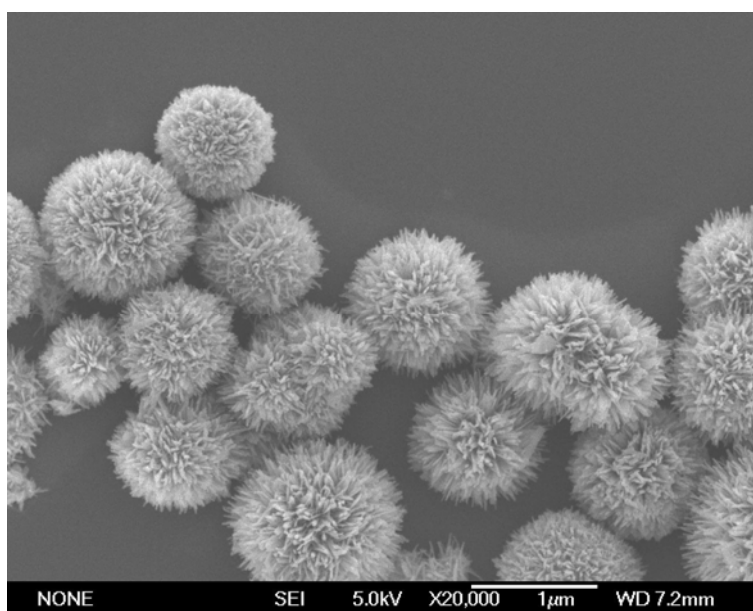

**Figure S1.** A typical FESEM image of sample A.

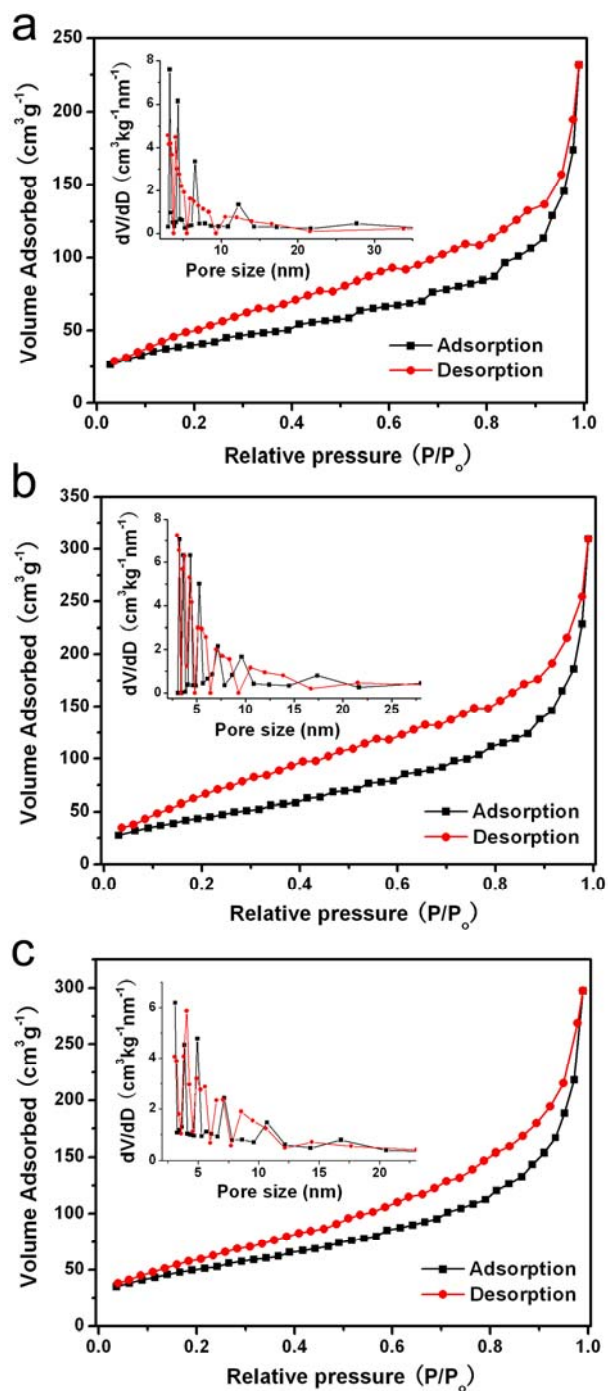

**Figure S2.**  $N_2$  adsorption-desorption isotherm of sample A (a), sample B (b), and sample C (c).
